# Supplementary material
Source: ML conference proceedings conference paper supplement (https://openreview.net/forum?id=ATgLNAuync)
Supplement: supplementary_material [file attachment]

We have established an anonymous repository to share our model weights, and part of the code. The full release of the repository will be made upon acceptance of the paper. We greatly appreciate the support and thorough review provided by the Area Chairs and Reviewers of our paper.

Please note that the provided link to the repository complies with the double-blind review policy, as it has been anonymized appropriately.

Repository URL:

[https://drive.google.com/drive/folders/1HvwpR80y1XB\\_88lC\\_0jiBV7clgkUVPmp?hl](https://drive.google.com/drive/folders/1HvwpR80y1XB_88lC_0jiBV7clgkUVPmp?hl)

**Thank you very much for your consideration and support!**
